# Supplementary material
Source: PubMed Central journal article supplement (PMC8388314)
Supplement: NIHMS1728716-supplement-Supplemental_Table_1.pdf [file NIHMS1728716-supplement-Supplemental_Table_1.pdf]

**Supplemental Table 1. Predicted Mean Response to Knowledge, Attitude, and Norms (KAN) and Media Items by Student Characteristics**

|                                                                                                                                                         | Predicted mean response (95% CI) <sup>a</sup> to KAN and media items by student characteristics |                                     |                                        |                      |                                |                      |                      |
|---------------------------------------------------------------------------------------------------------------------------------------------------------|-------------------------------------------------------------------------------------------------|-------------------------------------|----------------------------------------|----------------------|--------------------------------|----------------------|----------------------|
|                                                                                                                                                         | Race/Ethnicity                                                                                  |                                     |                                        |                      |                                | FRPM Eligibility     |                      |
|                                                                                                                                                         | White                                                                                           | Asian Pacific Islander <sup>b</sup> | Black or African American <sup>b</sup> | Hispanic             | Two or More Races <sup>b</sup> | Not eligible         | Eligible             |
| KAN and media items                                                                                                                                     |                                                                                                 |                                     |                                        |                      |                                |                      |                      |
| Response scale for below: 1=has no effect on health to 4=is extremely unhealthy <sup>c</sup>                                                            |                                                                                                 |                                     |                                        |                      |                                |                      |                      |
| <b>Attitude</b> that sugary drink are unhealthy: "... <i>drinking sugary drinks...</i> "                                                                | 2.69<br>(2.61, 2.76)                                                                            | 2.61<br>(2.46, 2.76)                | 2.53<br>(2.42, 2.65)                   | 2.64<br>(2.55, 2.73) | 2.72<br>(2.61, 2.83)           | 2.66<br>(2.60, 2.71) | 2.62<br>(2.54, 2.70) |
| <b>Norm</b> —friends think sugary drinks are unhealthy: "... <i>your friends think drinking sugary drinks...</i> "                                      | 2.32<br>(2.25, 2.39)                                                                            | 2.18<br>(2.02, 2.33)                | 2.09<br>(1.99, 2.19)                   | 2.25<br>(2.17, 2.34) | 2.39<br>(2.27, 2.51)           | 2.24<br>(2.19, 2.29) | 2.29<br>(2.21, 2.38) |
| <b>Norm</b> —frequency of peer sugary drink consumption: " <i>How often do ... most students...drink sugary drinks? (response in times/day)</i> "       | 1.0<br>(0.9, 1.1)                                                                               | 1.5<br>(1.2, 1.7)                   | 1.7<br>(1.5, 1.8)                      | 1.3<br>(1.1, 1.4)    | 1.3<br>(1.1, 1.4)              | 1.2<br>(1.1, 1.3)    | 1.4<br>(1.3, 1.5)    |
| Response scale for below: 1=strongly disagree to 5=strongly agree <sup>d</sup>                                                                          |                                                                                                 |                                     |                                        |                      |                                |                      |                      |
| <b>Knowledge</b> that liquid sugar is less satiating: " <i>Foods with sugar...make you feel full for a longer time than drinks with sugar in them</i> " | 3.41<br>(3.30, 3.53)                                                                            | 3.24<br>(2.99, 3.49)                | 3.09<br>(2.92, 3.26)                   | 3.24<br>(3.10, 3.37) | 3.32<br>(3.16, 3.49)           | 3.30<br>(3.21, 3.39) | 3.25<br>(3.12, 3.37) |
| <b>Knowledge</b> that sugary drinks increase diabetes risk: " <i>Drinking sugary drinks can lead to diabetes...</i> "                                   | 4.34<br>(4.25, 4.42)                                                                            | 4.18<br>(3.95, 4.41)                | 3.99<br>(3.81, 4.17)                   | 4.19<br>(4.05, 4.33) | 4.23<br>(4.05, 4.40)           | 4.21<br>(4.13, 4.29) | 4.20<br>(4.09, 4.32) |
| <b>Knowledge</b> that sugary drinks can cause cavities: " <i>Drinking sugary drinks can cause cavities...</i> "                                         | 4.62<br>(4.54, 4.71)                                                                            | 4.44<br>(4.19, 4.68)                | 4.21<br>(4.03, 4.38)                   | 4.51<br>(4.40, 4.62) | 4.47<br>(4.30, 4.63)           | 4.45<br>(4.37, 4.54) | 4.52<br>(4.42, 4.62) |
| <b>Media</b> —belief that sugary drink ads target kids: "... <i>sugary drink [ads] were designed for kids...</i> "                                      | 4.14<br>(4.03, 4.24)                                                                            | 3.83<br>(3.56, 4.10)                | 3.71<br>(3.54, 3.89)                   | 4.03<br>(3.90, 4.16) | 4.18<br>(4.01, 4.34)           | 4.03<br>(3.95, 4.12) | 3.96<br>(3.84, 4.08) |
| <b>Media</b> —belief that sugary drink ads "cause people to drink more sugary drinks..."                                                                | 4.00<br>(3.90, 4.11)                                                                            | 3.76<br>(3.51, 4.01)                | 3.74<br>(3.57, 3.91)                   | 3.87<br>(3.74, 4.00) | 3.95<br>(3.77, 4.13)           | 3.87<br>(3.78, 3.95) | 3.94<br>(3.83, 4.05) |
| <b>Media</b> —belief that "you can trust food and beverage advertisements"                                                                              | 1.90<br>(1.80, 2.00)                                                                            | 2.06<br>(1.81, 2.31)                | 2.29<br>(2.11, 2.46)                   | 2.30<br>(2.15, 2.44) | 1.99<br>(1.83, 2.15)           | 2.03<br>(1.94, 2.11) | 2.22<br>(2.09, 2.34) |

Acronyms: KAN—knowledge, attitudes, and norms, FRPM—Free and reduced price meal, ref—reference group.

<sup>a</sup> Means (95% CIs) are from the margins command in Stata after running linear regression models with robust standard errors, including the following independent variables: school, grade level, gender, race/ethnicity, and FRPM eligibility.

<sup>b</sup> Non-Hispanic

<sup>c</sup> 1=Has no effect on health, 2=Is a little unhealthy, 3=Is very unhealthy, 4=Is extremely unhealthy

<sup>d</sup> 1=Strongly Disagree, 2=Sort of Disagree, 3=Neither, 4=Sort of Agree, 5=Strongly Agree
